# Supplementary material for: Aortic Calcification Onset and Progression: Association With the Development of Coronary Atherosclerosis
Source: PubMed Central journal article supplement — J Am Heart Assoc. 2017 Mar 30;6(4):e005093. doi: 10.1161/JAHA.116.005093 (PMC5533012; doi:10.1161/jaha.116.005093), 2017-03-30

# **SUPPLEMENTAL MATERIAL**

**Table S1.** Amount of incident CAC (CAC<sub>i</sub>) after 5 yrs, distributed in different CAC-categories depending on baseline amount of TAC in separate aortic segments.

| Baseline ATAC <sub>bl</sub> - / DTAC <sub>bl</sub> -score<br>(n=1185)                                                                                                                                                                                | Amount of incident CAC <sub>i</sub> after 5 yrs |                                          |                                          | p for trend |
|------------------------------------------------------------------------------------------------------------------------------------------------------------------------------------------------------------------------------------------------------|-------------------------------------------------|------------------------------------------|------------------------------------------|-------------|
|                                                                                                                                                                                                                                                      | CAC <sub>i</sub> =0<br>(n=886, 75%)             | CAC <sub>i</sub> 1 to 99<br>(n=290, 24%) | CAC <sub>i</sub> 100 to 399<br>(n=9, 1%) |             |
| ATAC <sub>bl</sub> =0<br>(n=881, 74%)                                                                                                                                                                                                                | 683 (78%)                                       | 193 (21%)                                | 5 (1%)                                   | <0.0001     |
| ATAC <sub>bl</sub> 1 to 99<br>(n=272, 23%)                                                                                                                                                                                                           | 188 (69%)                                       | 81 (30%)                                 | 3 (1%)                                   |             |
| ATAC <sub>bl</sub> 100 to 399<br>(n=26, 2%)                                                                                                                                                                                                          | 14 (54%)                                        | 11 (42%)                                 | 1 (4%)                                   |             |
| ATAC <sub>bl</sub> ≥400<br>(n=6, 1%)                                                                                                                                                                                                                 | 1 (17%)                                         | 5 (83%)                                  | 0 (0%)                                   |             |
| DTAC <sub>bl</sub> =0<br>(n=635, 53%)                                                                                                                                                                                                                | 480 (76%)                                       | 151 (23%)                                | 4 (1%)                                   | 0.008       |
| DTAC <sub>bl</sub> 1 to 99<br>(n=469, 40%)                                                                                                                                                                                                           | 359 (76%)                                       | 106 (23%)                                | 4 (1%)                                   |             |
| DTAC <sub>bl</sub> 100 to 399<br>(n=61, 5%)                                                                                                                                                                                                          | 40 (65%)                                        | 20 (33%)                                 | 1 (2%)                                   |             |
| DTAC <sub>bl</sub> ≥400<br>(n=20, 2%)                                                                                                                                                                                                                | 7 (35%)                                         | 13 (65%)                                 | 0 (0%)                                   |             |
| Abbreviations:<br>CAC <sub>i</sub> = incidence of coronary artery calcification, in ascending aorta, ATAC <sub>bl</sub> = calcification at baseline in ascending aorta, DTAC <sub>bl</sub> = calcification at baseline in descending thoracic aorta. |                                                 |                                          |                                          |             |

**Table S2.** Amount of incident TAC ( $TAC_i$ ) after 5 yrs distributed in different  $TAC_i$ -categories depending on baseline amount of CAC ( $CAC_{bl}$ ).

| Baseline $CAC_{bl}$ -score<br>(n=1243)                                                                                                                       | Amount of incident $TAC_i$ after 5 yrs |                                 |                                    |                                | p for trend |
|--------------------------------------------------------------------------------------------------------------------------------------------------------------|----------------------------------------|---------------------------------|------------------------------------|--------------------------------|-------------|
|                                                                                                                                                              | $TAC_i=0$<br>(n=726, 58%)              | $TAC_i$ 1 to 99<br>(n=320, 26%) | $TAC_i$ 100 to 399<br>(n=141, 11%) | $TAC_i \geq 400$<br>(n=56, 5%) |             |
| $CAC_{bl}=0$<br>(n=587, 47%)                                                                                                                                 | 401 (68%)                              | 136 (23%)                       | 39 (7%)                            | 11 (2%)                        | <0.0001 §)  |
| $CAC_{bl}$ 1 to 99<br>(n=466, 37%)                                                                                                                           | 257 (55%)                              | 126 (27%)                       | 66 (14%)                           | 17 (4%)                        |             |
| $CAC_{bl}$ 100 to 399<br>(n=145, 12%)                                                                                                                        | 61 (42%)                               | 44 (30%)                        | 24 (17%)                           | 16 (11%)                       |             |
| $CAC_{bl} \geq 400$<br>(n=45, 4%)                                                                                                                            | 7 (15%)                                | 14 (31%)                        | 12 (27%)                           | 12 (27%)                       |             |
| Abbreviations: $CAC_{bl}$ = coronary artery calcification at baseline, $TAC_i$ = amount of incident thoracic aortic calcification. §) = Mantel-Haenszel test |                                        |                                 |                                    |                                |             |

**Table S3.** Amount of incident calcification in separate aortic segments after 5 yrs distributed in different categories depending on baseline amount of CAC.

| Amount of incident<br>ATAC <sub>i</sub> / DTAC <sub>i</sub><br>after 5 yrs                                                                                                                                      | Baseline CAC <sub>bl</sub> score<br>(n=1243) |                                           |                                              |                                      | p for trend |
|-----------------------------------------------------------------------------------------------------------------------------------------------------------------------------------------------------------------|----------------------------------------------|-------------------------------------------|----------------------------------------------|--------------------------------------|-------------|
|                                                                                                                                                                                                                 | CAC <sub>bl</sub> =0<br>(n=587, 47%)         | CAC <sub>bl</sub> 1 to 99<br>(n=466, 37%) | CAC <sub>bl</sub> 100 to 399<br>(n=145, 12%) | CAC <sub>bl</sub> ≥400<br>(n=45, 4%) |             |
| ATAC <sub>i</sub> =0<br>(n=959, 77%)                                                                                                                                                                            | 505 (86%)                                    | 345 (74%)                                 | 92 (63%)                                     | 17 (37%)                             | <0.0001     |
| ATAC <sub>i</sub> 1 to 99<br>(n=238, 19%)                                                                                                                                                                       | 72 (12%)                                     | 106 (23%)                                 | 43 (30%)                                     | 17 (38%)                             |             |
| ATAC <sub>i</sub> 100 to 399<br>(n=40, 3%)                                                                                                                                                                      | 10 (2%)                                      | 15 (3%)                                   | 7 (5%)                                       | 8 (18%)                              |             |
| ATAC <sub>i</sub> ≥400<br>(n=6, 1%)                                                                                                                                                                             | 0 (0%)                                       | 0 (0%)                                    | 3 (2%)                                       | 3 (7%)                               |             |
| DTAC <sub>i</sub> =0<br>(n=845, 68%)                                                                                                                                                                            | 442 (75%)                                    | 315 (68%)                                 | 74 (51%)                                     | 14 (31%)                             | <0.0001     |
| DTAC <sub>i</sub> 1 to 99<br>(n=243, 19%)                                                                                                                                                                       | 107 (19%)                                    | 86 (18%)                                  | 38 (26%)                                     | 12 (27%)                             |             |
| DTAC <sub>i</sub> 100 to 399<br>(n=112, 9%)                                                                                                                                                                     | 30 (5%)                                      | 49 (11%)                                  | 22 (15%)                                     | 11 (24%)                             |             |
| DTAC <sub>i</sub> ≥400<br>(n=43, 4%)                                                                                                                                                                            | 8 (1%)                                       | 16 (3%)                                   | 11 (8%)                                      | 8 (18%)                              |             |
| Abbreviations:<br>ATAC <sub>i</sub> = incident calcification in ascending aorta, DTAC <sub>i</sub> = incident calcification in descending aorta, CAC <sub>bl</sub> = coronary artery calcification at baseline. |                                              |                                           |                                              |                                      |             |

**Table S4.** CAC-Progression in 5 yrs distributed in slow, expected and fast progression depending on baseline amount of TAC in in separate aortic segments.

| Baseline ATAC <sub>bl</sub> - / DTAC <sub>bl</sub> -score<br>(n=3270)                                                                                                                                 | CAC-Progression in 5 yrs         |                                       |                                  | p for trend |
|-------------------------------------------------------------------------------------------------------------------------------------------------------------------------------------------------------|----------------------------------|---------------------------------------|----------------------------------|-------------|
|                                                                                                                                                                                                       | Slow Progression<br>(n=395, 12%) | Expected Progression<br>(n=2238, 68%) | Fast Progression<br>(n=637, 20%) |             |
| ATAC <sub>bl</sub> =0<br>(n=1924, 59%)                                                                                                                                                                | 261 (14%)                        | 1298 (68%)                            | 365 (18%)                        | 0.0002      |
| ATAC <sub>bl</sub> 1 to 99<br>(n=993, 30%)                                                                                                                                                            | 111 (11%)                        | 693 (70%)                             | 189 (19%)                        |             |
| ATAC <sub>bl</sub> 100 to 399<br>(n=257, 8%)                                                                                                                                                          | 21 (8%)                          | 180 (70%)                             | 56 (22%)                         |             |
| ATAC <sub>bl</sub> ≥400<br>(n=96, 3%)                                                                                                                                                                 | 2 (2%)                           | 67 (70%)                              | 27 (28%)                         |             |
| DTAC <sub>bl</sub> =0<br>(n=1456, 44%)                                                                                                                                                                | 209 (14%)                        | 969 (67%)                             | 278 (19%)                        | 0.0009      |
| DTAC <sub>bl</sub> 1 to 99<br>(n=1230, 38%)                                                                                                                                                           | 136 (11%)                        | 858 (70%)                             | 236 (19%)                        |             |
| DTAC <sub>bl</sub> 100 to 399<br>(n=362, 11%)                                                                                                                                                         | 39 (11%)                         | 253 (70%)                             | 70 (11%)                         |             |
| DTAC <sub>bl</sub> ≥400<br>(n=222, 7%)                                                                                                                                                                | 11 (5%)                          | 158 (71%)                             | 53 (24%)                         |             |
| Abbreviations:<br>ATAC <sub>bl</sub> = calcification at baseline in ascending aorta, DTAC <sub>bl</sub> = calcification at baseline in descending thoracic aorta CAC = coronary artery calcification. |                                  |                                       |                                  |             |

**Figure S1.** Flow diagram of the original study participants and steps of exclusion, resulting in participants eligible for final analysis.

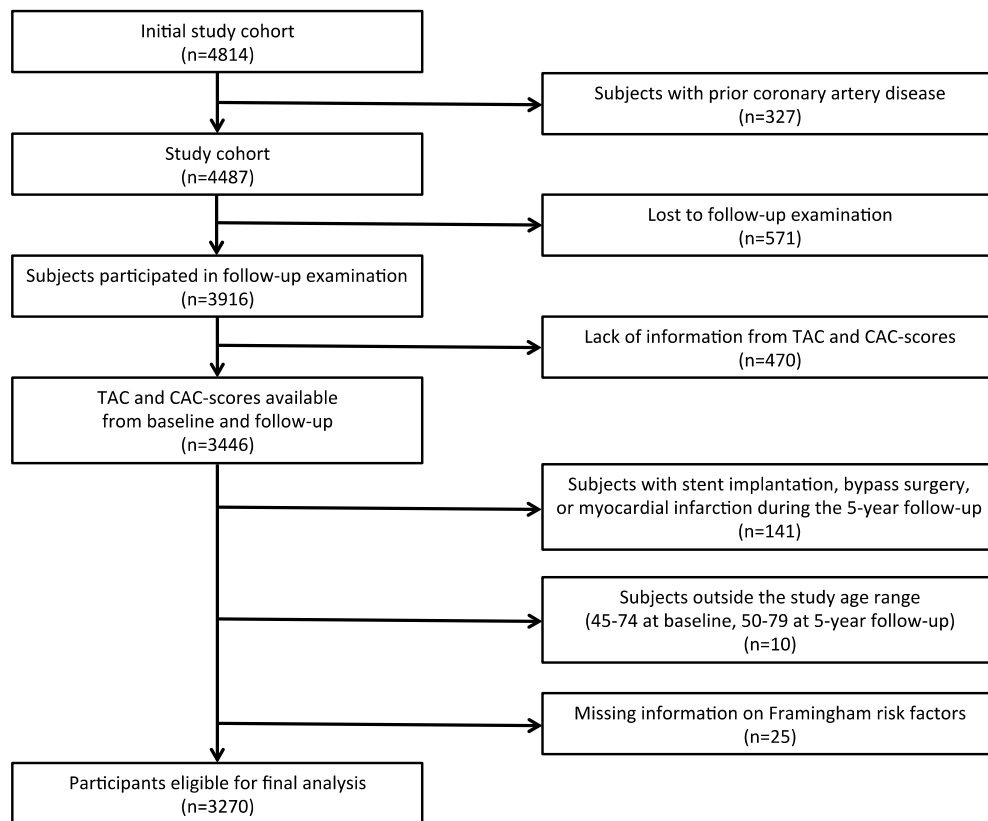

Supplement: JAH3-6-e005093-s001.pdf [file JAH3-6-e005093-s001.pdf]
